# Supplementary material for: A super-resilient and highly sensitive graphene oxide/cellulose-derived carbon aerogel
Source: Royal Society of Chemistry journal article supplement (doi:10.1039/d0ta05310d), 2020-01-01
Supplement: d0ta05310d1.pdf [file d0ta05310d1.pdf]

# **Super-resilient and highly sensitive graphene oxide/cellulose-derived carbon aerogel**

**Wenzhao Jiang, Chenfei Yao, Wei Chen, Di Li, Linxin Zhong\*, and Chuanfu Liu\***

State Key Laboratory of Pulp and Paper Engineering, South China University of  
Technology, Guangzhou, 510641, China.

\* Corresponding author. E-mail: lxzhong0611@scut.edu.cn  
(L.Zhong), chfliu@scut.edu.cn (C. Liu)

## **Table of Contents**

- S1. Details on experimental methods
- S2. Figures for characterization, experimental results
- S3. Tabulated results
- S4. References

## S1. Details on experimental methods

**Materials.** Hydroxypropyl methyl cellulose (HPMC) was purchased from Macklin, China. Graphite powders were purchased from Nanjing XFNANO MaterialsTech Co., Ltd. 98 wt% H<sub>2</sub>SO<sub>4</sub> and KMnO<sub>4</sub> were purchased from Aladdin, China.

**Preparation of HPMC/GO suspension.** GO was prepared through oxidizing graphite powders via a modified Hummers method<sup>1</sup>, and then the obtained GO suspension was ultrasonicated (KQ-100B) for 10 min. To obtain HPMC/GO suspension, 1.08 g HPMC was dissolved in 33.92 mL deionized water, and then added 10.00 g GO suspension (1.8 wt%, 0.18 g GO). The above mixture was stirred for 12 h (500-600 rpm) and then ultrasonicated for another 1 h to make sure the remove of air bubbles and the homogeneous mixing of HPMC and GO.

**Fabrication of aerogels.** HPMC/GO suspension (15 mL) was poured into a plastic box (38 mm × 29 mm × 22 mm), and then the box was placed on a steel box filled with liquid nitrogen. After directional freeze-casting and freeze-drying (in a lyophilizer for 48 h), an aerogel (A-HPMC/GO-6, A and 6 represent aerogel and the mass ratio of HPMC to GO, respectively) was obtained. A-HPMC/GO-x with same solid content but different mass ratios of HPMC to GO (x= 1, 2, 4, 6, 8, 10 and 20, representing 1:1, 2:1, 4:1, 6:1, 8:1, 10:1 and 20:1, respectively) were prepared by the same method. In addition, pure HPMC aerogel (A-HPMC) and pure GO aerogel (A-GO) were fabricated from pure HPMC solution and GO suspension. To investigate the effect of directional freezing-casting on the structure and mechanical performance of carbon aerogel, control sample A-R-HPMC/GO-6 was prepared via a random freeze-drying method by immersing a plastic box containing HPMC/GO suspension in liquid nitrogen and then freeze-drying.

**Pre-oxidation of aerogels.** The aerogel was heated to 240 °C<sup>2, 3</sup> (0.5 °C min<sup>-1</sup>) in air using a muffle furnace and held for 4 h to obtain pre-oxidized aerogels before carbonization.

**Fabrication of carbon aerogels.** The pre-oxidized aerogel was carbonized in a tube furnace under N<sub>2</sub> atmosphere. There are three stages during carbonization. The first stage was carried out from room temperature to 300 °C (5 °C min<sup>-1</sup>). In the second stage, the sample was pyrolyzed from 300 °C to 400 °C at a heating rate of  $v$  °C min<sup>-1</sup> ( $v = 0.5, 1, 3$ , respectively) and held at 400 °C for 1 h. In the last stage, aerogel was heated to 750 °C (5 °C min<sup>-1</sup>) and kept at 750 °C for 2 h to obtain a carbon aerogel. Aerogels (A-HPMC/GO-x, A-HPMC, A-GO and A-R-HPMC/rGO-6) treated by both pre-oxidation and carbonization were named as C-HPMC/rGO-x, C-HPMC, C-rGO and C-R-HPMC/rGO-6, respectively. For comparison, C-N-HPMC/rGO-6 was prepared by directly carbonizing A-HPMC/GO-6 (without pre-oxidation).

**Characterizations.** The morphologies of all aerogels were observed on scanning electron microscopy (SEM, Merlin, Zeiss) and transmission electron microscopy (TEM, JEM-2100F). Thermal gravity analysis (TGA) was performed on a Pyris Diamond TG/DSC-200 with a heating rate of 10 °C min<sup>-1</sup> at the temperature range of 25 to 700 °C in a N<sub>2</sub> atmosphere. The surface area of carbon aerogel was determined from N<sub>2</sub> (77.4 K) adsorption-desorption isotherms using an ASAP-2046 surface area analyzer. The surface area was calculated using a Brunauer-Emmett-Teller (BET) method in the linear range of P/P<sub>0</sub>=0.01-0.1. X-ray diffraction (XRD) patterns were recorded on a Bruker D8 diffractometer using Cu K $\alpha$  radiation as the X-ray source. Infrared (IR) data were recorded on a Fourier transform IR spectrometer (VERTEX 70, Bruker Corp., Germany). Raman spectra were carried out on Raman spectrometer (LabRAM ARAMIS-Horiba Jobin Yvon) operating under 532 nm excitation. Compression, elasticity, and fatigue

resistance were performed on a compressive instrument (Instron 5565). The electrical current was measured on an electrochemical workstation (CHI 660E).

***Assembly and testing of sensor.*** The C-HPMC/rGO-6-based sensor was assembled by placing C-HPMC/rGO-6 into two pieces of PET substrates adhered with Al sheets. The strain and loading pressure were conducted by using Instron 5565. The real-time current was recorded on CHI 660E (applying a voltage of 1 V).

## S2. Figures for characterization, experimental results

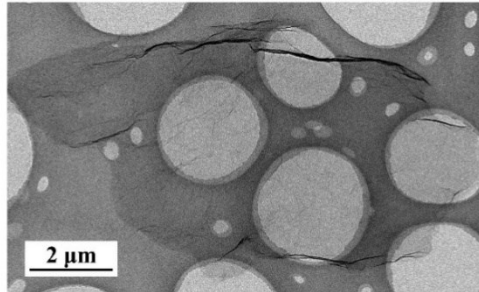

**Figure S1.** Transmission electron microscopy (TEM) image of GO.

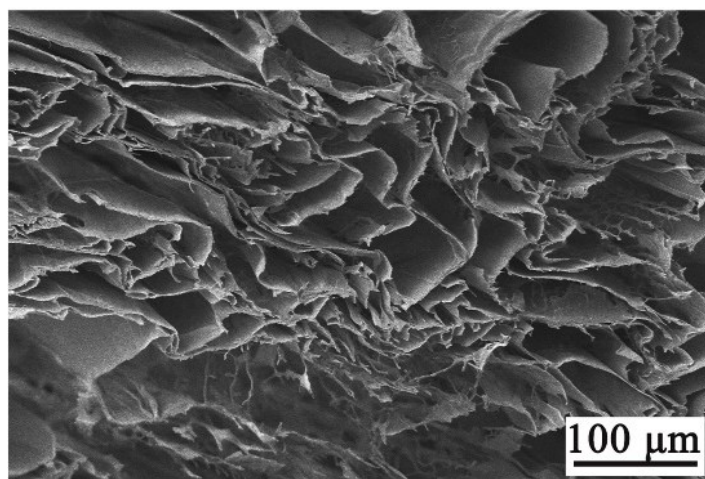

**Figure S2.** Scanning electron microscopy(SEM) images of A-HPMC.

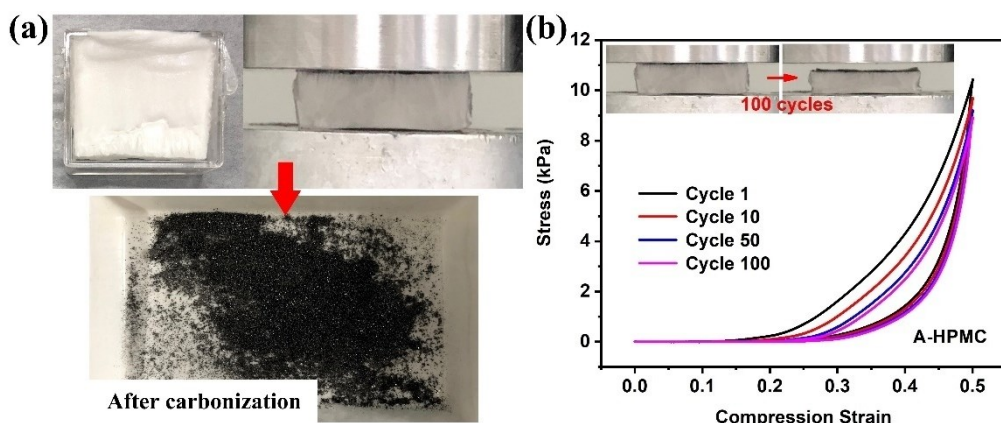

**Figure S3.** Digital photographs of (a) A-HPMC and C-HPMC. (b) Stress-strain curves of A-HPMC.

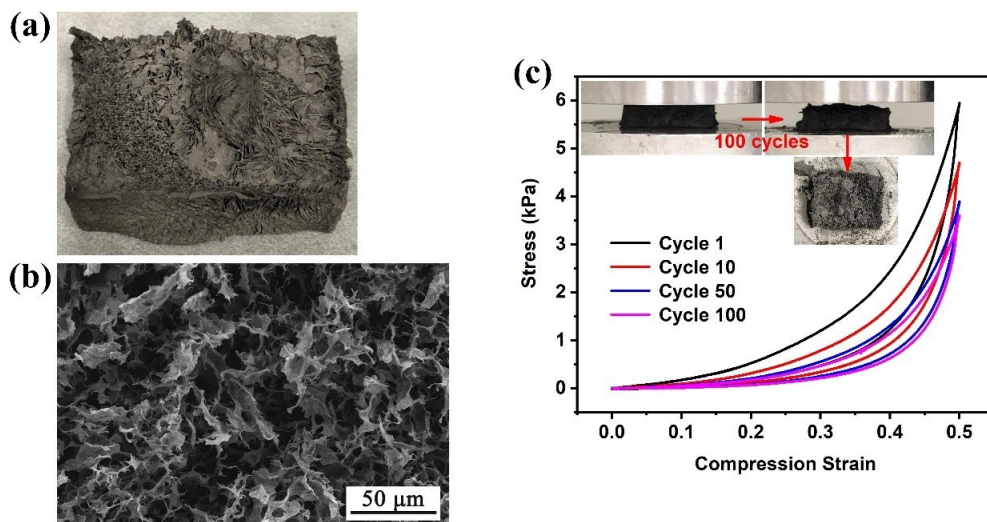

**Figure S4.** (a) Digital photograph, (b) SEM image, and (c) stress-strain curves of C-R-HPMC/rGO-6 (fabricated by random freeze-casting).

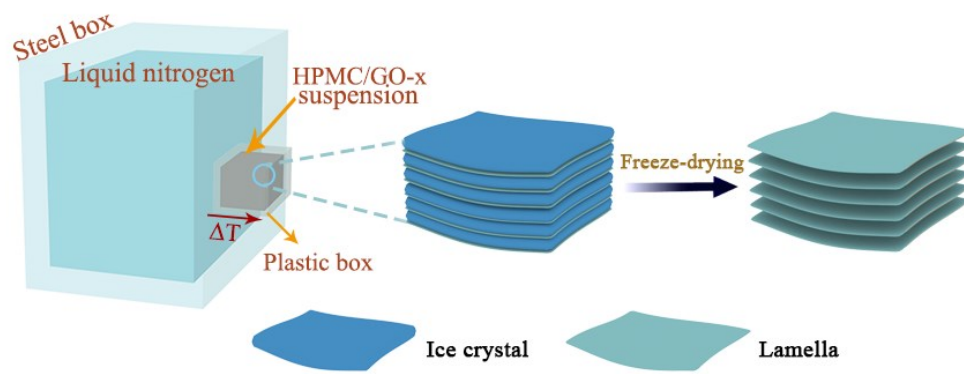

**Figure S5.** The schematic diagram of directional freezing.



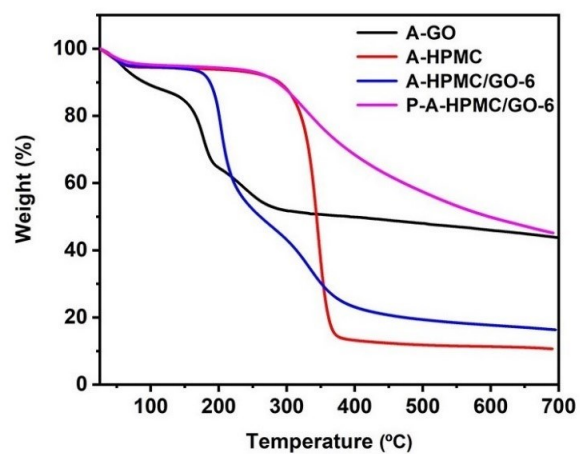

**Figure S6.** Thermogravimetric analysis (TGA) curves of the as-prepared aerogels.

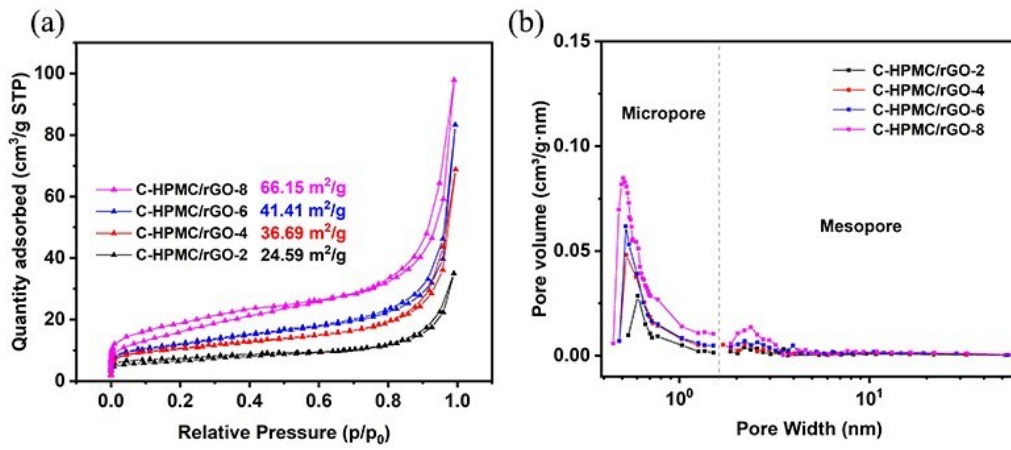

**Figure S7.** (a) Nitrogen adsorption-desorption isotherms and (b) pore size distributions of C-HPMC/rGO-x.

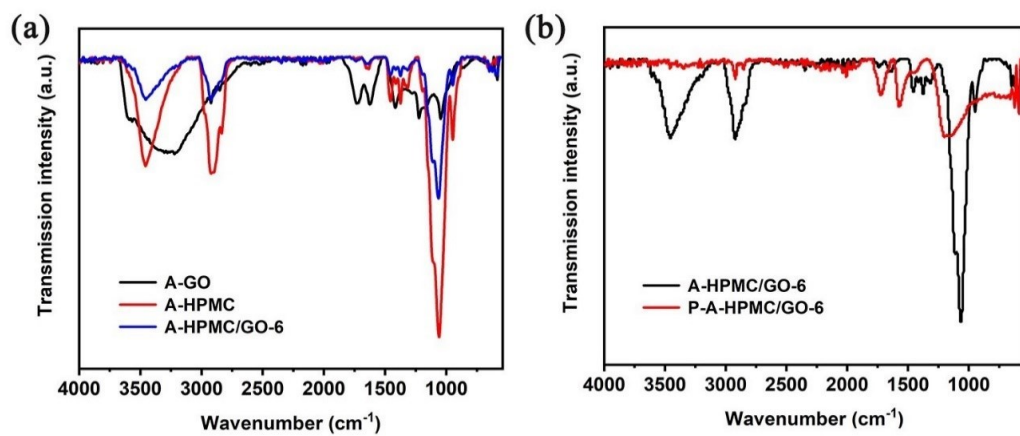

**Figure S8.** FT-IR spectra of the as-prepared aerogels.

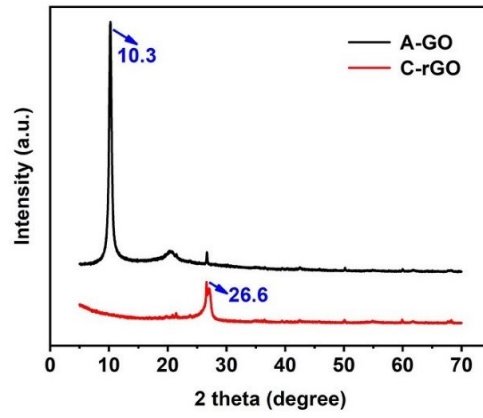

**Figure S9.** XRD patterns of A-GO and C-rGO.

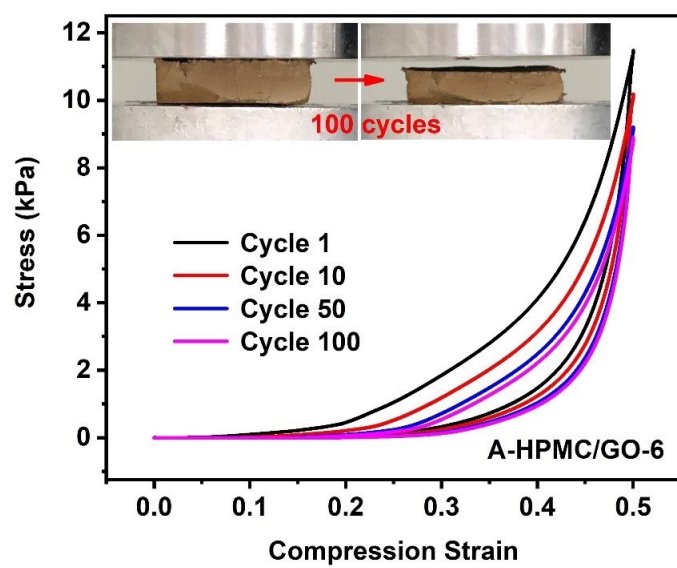

Figure S10. Stress-strain curves of A-HPMC/GO-6.

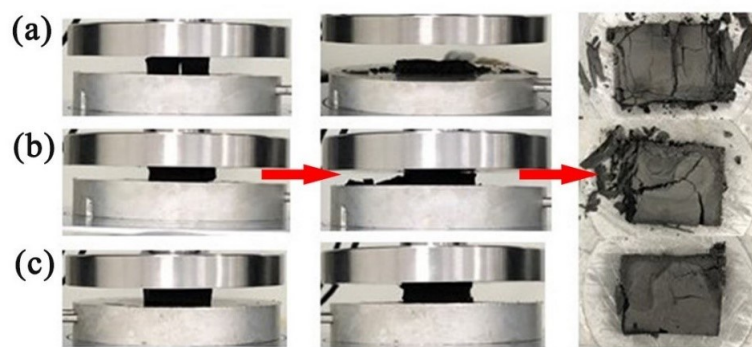

**Figure S11.** Digital photographs of C-HPMC/rGO-6 with different solid contents after 10 cycles: (a) 5 wt%, (b) 7 wt%, and (c) 9 wt%, respectively.

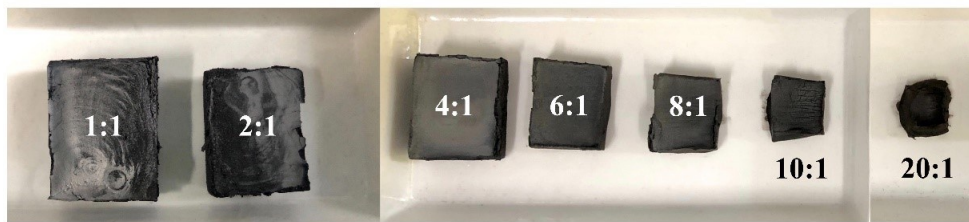

**Figure S12.** Digital photographs of C-HPMC/rGO-x.

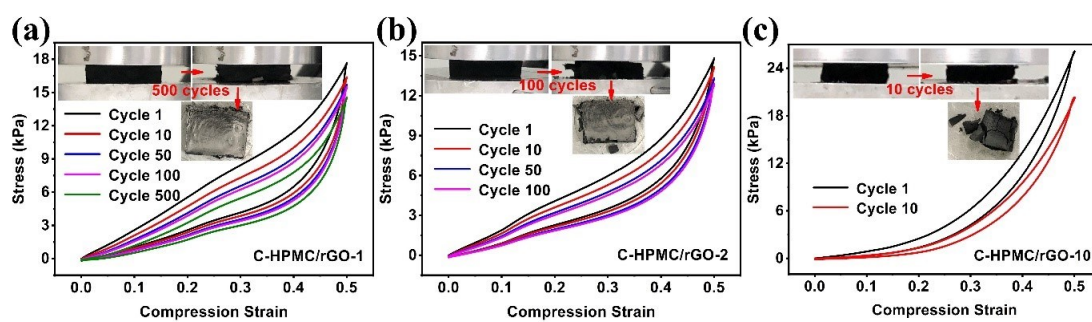

**Figure S13.** Stress-strain curves of (a) C-HPMC/rGO-1, (b) C-HPMC/rGO-2, (c) C-HPMC/rGO-10.



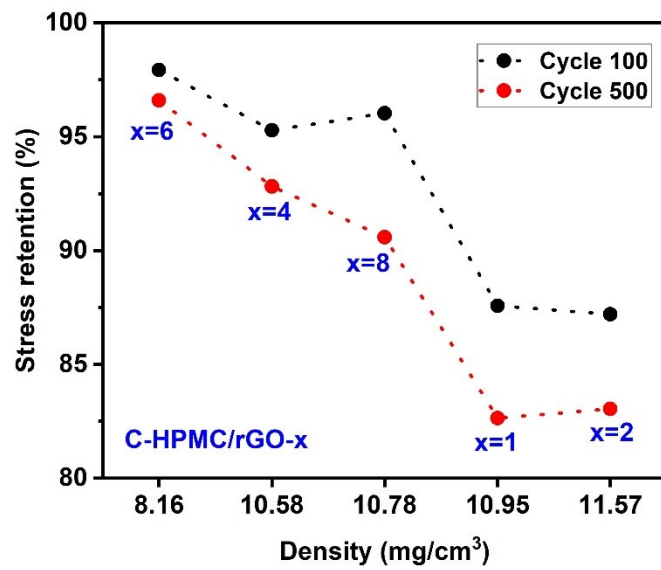

**Figure S14.** Mechanical properties of C-HPMC/rGO-x vs density.

### S3. Tabulated results

**Table S1.** Stress retentions (30% strain) of C-HPMC/rGO-6 with different heating rates (300-400 °C).

| Heating rate (°C min <sup>-1</sup> ) | 500 <sup>th</sup> (%) | 1000 <sup>th</sup> (%) |
|--------------------------------------|-----------------------|------------------------|
| 0.5                                  | 90.54                 | 88.58                  |
| 1.0                                  | 88.70                 | 86.93                  |
| 3.0                                  | 83.87                 | 81.14                  |

**Table S2.** Stress retentions of C-HPMC/rGO-6 with different treatment before carbonization at 30% strain.

| Process               | 500 <sup>th</sup> (%) | 1000 <sup>th</sup> (%) |
|-----------------------|-----------------------|------------------------|
| With pre-Oxidation    | 94.73                 | 94.10                  |
| Without pre-Oxidation | 90.54                 | 88.58                  |

**Table S3.** Stress retentions of C-HPMC/rGO-x with different mass rates of HPMC to GO at 50% strain.

| Cycles | 100 <sup>th</sup>         | 500 <sup>th</sup> | 1000 <sup>th</sup> |
|--------|---------------------------|-------------------|--------------------|
| 1:1    | 87.58%                    | 82.64%            | -                  |
| 2:1    | 87.20%                    | 83.05%            | -                  |
| 10:1   | Collapsed after 10 cycles |                   |                    |
| 20:1   | Collapsed after 1 cycles  |                   |                    |

#### **S4. References**

1W. S. H. Jr and R. E. Offeman, 1958, **80**, 1339.

2A. C. Pastor, F. Rodriguez-Reinoso, H. Marsh and M. A. Martinez, *Carbon*, 1999, **37**, 1275-1283.

3H. Wu, S.-w. Fan, X.-w. Yuan, L.-f. Chen and J.-l. Deng, *New Carbon Materials*, 2013, **28**, 448-453.
